# Supplementary material for: Consistent responses of vegetation gas exchange to elevated atmospheric CO 2 emerge from heuristic and optimization models
Source: Copernicus journal article supplement (doi:10.5194/bg-2022-36), 2022-02-07
Supplement: Supplementary file 1 [file Supplementary data.xlsx]

## Sheet: Data Figure 3
Data source	Dominant species/ecosystem	Plant functional type	Ambient CO2 concentration (µmol/mol)	Relative change in CO2 concentration	Relative change in leaf area	Notes
Tissue et al. (1997)	Pinus taeda	Conifer tree/shrub	362	0.820442	0.538192
Norby et al. (1999)	Quercus alba	Angiosperm tree/shrub	350	0.428571	0.204721
Norby et al. (1999)	Quercus alba	Angiosperm tree/shrub	350	0.857143	0.910134
Bunce et al. (2016)	Glycine max Spencer	Annual crop	445	0.47191	0.192708
Bunce et al. (2016)	Glycine max Holt	Annual crop	445	0.47191	0.207547
Bunce et al. (2016)	Triticum aestivum Pioneer	Annual crop	418	0.502392	0.140873
Bunce et al. (2016)	Triticum aestivum Choptank	Annual crop	418	0.502392	0.128205
McCarthy et al. (2006)	Pinus taeda (unfertilized)	Conifer tree/shrub	376	0.462766	0.170447
McCarthy et al. (2006)	Pinus taeda (fertilized)	Conifer tree/shrub	376	0.462766	0.141823
McCarthy et al. (2006)	Populus tremuloides	Angiosperm tree/shrub	376	0.462766	0.545455
McCarthy et al. (2006)	Populus tremuloides, Betula papyrifera	Angiosperm tree/shrub	376	0.462766	0.518182
McCarthy et al. (2006)	Liquidambar styraciflua	Angiosperm tree/shrub	376	0.462766	0.0594828
McCarthy et al. (2006)	Populus alba	Angiosperm tree/shrub	376	0.462766	-0.04375
McCarthy et al. (2006)	Populus nigra	Angiosperm tree/shrub	376	0.462766	0.0576923
McCarthy et al. (2006)	Populus euramericana	Angiosperm tree/shrub	376	0.462766	0.0465854
Polley et al. (2008)	Grassland	Perennial herbaceous	350	0.571429	0.532258
Pritchard et al. (1999)	Gossypium hirsuium	Annual crop	340	1	0.14
Pritchard et al. (1999)	Zea mays	Annual crop	340	1	0.4
Pritchard et al. (1999)	Helianthus annuus	Annual crop	340	1	0.14
Pritchard et al. (1999)	Vigna unguiculata	Annual crop	340	1	0.56
Pritchard et al. (1999)	Macroptilium purpureum	Annual crop	340	1	0.39
Pritchard et al. (1999)	Oryza sativa	Annual crop	340	1	0
Pritchard et al. (1999)	Phalaris aquatica	Annual crop	340	1	0.31
Pritchard et al. (1999)	Amaranthus sp.	Annual crop	340	1	0.15
Pritchard et al. (1999)	Sorghum bicolor	Annual crop	340	1	0.29
Pritchard et al. (1999)	Brassica napus	Annual crop	340	1	0.4
Pritchard et al. (1999)	Hordeum vulgare	Annual crop	340	1	0.57
Pritchard et al. (1999)	Vicia faba	Annual crop	340	1	0.42
Pritchard et al. (1999)	Pisum sativum	Annual crop	340	1	0.53
Pritchard et al. (1999)	Medicago sativa	Annual crop	340	1	0.75
Donohue et al. (2017)	Arid shrubland	Angiosperm tree/shrub	513	0.489279	0.15	FACE site in the data synthesis not included in other data sources
Duursma et al. (2016)	Eucalyptus sp.	Angiosperm tree/shrub	400	0.375	0
Bader et al. (2013)	Mixed deciduous	Angiosperm tree/shrub	380	0.447368	0
Pan et al. (2020)	Tallgrass prairie	Perennial herbaceous	355	0.97	0.12	FACE site in the data synthesis not included in other data sources
Pan et al. (2020)	Alpine meadow	Perennial herbaceous	365	0.64	0.04	FACE site in the data synthesis not included in other data sources

## Sheet: Reference list
Reference list
Bader, M., Leuzinger, S., Keel, S., Siegwolf, R., Hagedorn, F., Schleppi, P., and Korner, C.: Central European hardwood trees in a high-CO2 future: synthesis of an 8-year forest canopy CO2 enrichment project, J. Ecol., 101, 1509–1519, https://doi.org/10.1111/1365-2745.12149, 2013.
Bunce, J. A.: Responses of soybeans and wheat to elevated CO2 in free-air and open top chamber systems, Field Crops Res., 186, 78–85, https://doi.org/10.1016/j.fcr.2015.11.010, 2016.
Donohue, R. J., Roderick, M. L., McVicar, T. R., and Yang, Y. T.: A simple hypothesis of how leaf and canopy-level transpiration and assimilation respond to elevated CO2 reveals distinct response patterns between disturbed and undisturbed vegetation, J. Geophys. Res.-Biogeosciences, 122, 168–184, https://doi.org/10.1002/2016jg003505, 2017.
Duursma, R., Gimeno, T., Boer, M., Crous, K., Tjoelker, M., and Ellsworth, D.: Canopy leaf area of a mature evergreen Eucalyptus woodland does not respond to elevated atmospheric [CO2] but tracks water availability, Glob. CHANGE Biol., 22, 1666–1676, https://doi.org/10.1111/gcb.13151, 2016.
McCarthy, H. R., Oren, R., Finzi, A. C., and Johnsen, K. H.: Canopy leaf area constrains [CO2]-induced enhancement of productivity and partitioning among aboveground carbon pools, Proc. Natl. Acad. Sci. U. S. A., 103, 19356–19361, 2006.
Norby, R. J., Wullschleger, S. D., Gunderson, C. A., Johnson, D. W., and Ceulemans, R.: Tree responses to rising CO2 in field experiments: implications for the future forest, Plant Cell Environ., 22, 683–714, 1999.
Pan, Y., Jackson, R. B., Hollinger, D. Y., Phillips, O. L., Nowak, R. S., Norby, R. J., Oren, R., Reich, P. B., Lüscher, A., Mueller, K. E., Owensby, C., Birdsey, R., Hom, J., and Luo, Y.: Contrasting responses of woody and grassland ecosystems to increased CO2 as water supply varies, Nat. Ecol. Evol., https://doi.org/10.1038/s41559-021-01642-6, 2022.
Polley, H. W., Johnson, H. B., Fay, P. A., and Sanabria, J.: Initial response of evapotranspiration from tallgrass prairie vegetation to CO2 at subambient to elevated concentrations, Funct. Ecol., 22, 163–171, 2008.
Pritchard, S. G., Rogers, H. H., Prior, S. A., and Peterson, C. M.: Elevated CO2 and plant structure: a review, Glob. Change Biol., 5, 807–837, https://doi.org/10.1046/j.1365-2486.1999.00268.x, 1999.
Tissue, D. T., Thomas, R. B., and Strain, B. R.: Atmospheric CO2 enrichment increases growth and photosynthesis of Pinus taeda: a 4 year experiment in the field, Plant Cell Environ., 20, 1123–1134, 1997.
